# Supplementary material for: Type W Human Endogenous Retrovirus (HERV-W) Integrations and Their Mobilization by L1 Machinery: Contribution to the Human Transcriptome and Impact on the Host Physiopathology
Source: PubMed Central journal article supplement (PMC5537654; doi:10.3390/v9070162), 2017-06-27
Supplement: viruses-09-00162-s001.pdf [file viruses-09-00162-s001.pdf]

Table S1: Syncytin-1 expression in pathological placentas

| Pathology                       | Syncytin-1 expression                | Clinical Manifestations                                                  | Ref.          |
|---------------------------------|--------------------------------------|--------------------------------------------------------------------------|---------------|
| Pre-eclampsia                   | ↓ Syncytin-1 expression <sup>a</sup> | ↓ trophoblasts fusion *<br>↓ trophoblasts differentiation *<br>↑ hypoxia | [43,64–67]    |
| HELLP syndrome                  | ↓ Syncytin-1 expression              | ↓ trophoblasts arterial transformation<br>↑ hypoxia                      | [64,65,68,69] |
| Trisomy 21                      | ↓ Syncytin-1 expression              | ↓ trophoblasts fusion *<br>↑ hypoxia<br>↑ trophoblasts apoptosis         | [70–73]       |
| IntraUterine Growth Restriction | ↓ Syncytin-1 expression              | ↓ trophoblasts fusion *<br>↑ hypoxia                                     | [66,74]       |
| Endometriosis                   | ↑ Syncytin-1 expression <sup>b</sup> | ?                                                                        | [57,58,75]    |

<sup>a</sup> Syncytin-1 promoter was hypermethylated

<sup>b</sup> Syncytin-1 promoter was hypomethylated

Clinical manifestations representing a direct effect of Syncytin-1 altered expression are marked with a \*.

Table S2. Major biases and current needs for HERV-W transcriptome studies

| Common biases                                                                           | Consequence                                                                                                              | Future needs and perspectives                                                                                                                                                                                                                                                                                                                            |
|-----------------------------------------------------------------------------------------|--------------------------------------------------------------------------------------------------------------------------|----------------------------------------------------------------------------------------------------------------------------------------------------------------------------------------------------------------------------------------------------------------------------------------------------------------------------------------------------------|
| Use of Syncytin-1/MSRV clones/HERV-W clones to design primers and probes and as a query | Lack of detection of transcripts with defective/divergent sequence, detection of recombinant chimeric transcripts        | Use of dedicated primers/probes mapping to univocal portions of each HERV-W locus; use of individual HERV-W loci sequences as a query and for the study of recombination events possibly occurring <i>in vitro</i> during amplification protocols                                                                                                        |
| Analysis of single HERV-W genes expression                                              | No information about the full-length sequence expression, the LTR residual activity and the genomic context of insertion | Link of the HERV-W gene transcripts to the locus of origin, analysis of LTR presence and structural preservation (e.g. conservation of promoters, enhancers, transcription factor binding sites), evaluation of the HERV-W co-localization and the possible interplay with host genes                                                                    |
| Unknown epigenetics status                                                              | Difficult interpretation of HERV-W expression cause/effect relationships                                                 | Identification of individual transcribed loci and evaluation of DNA methylation and non-coding RNAs networking, comparison of the latters between healthy and diseased (especially in those disorders affected by an altered epigenetic control, e.g. cancer and autoimmunity)                                                                           |
| Unknown basal expression activity in healthy conditions                                 | No reliable evaluation of altered expression in diseased contexts                                                        | Characterization of the individual HERV-W loci basal expression in healthy tissues, inclusion of paired case-control samples (optimally diseased and adjacent-healthy tissue from the same individual)                                                                                                                                                   |
| Low consideration of truncated elements                                                 | Poor knowledge regarding the potential effects of processed pseudogenes and solitary LTRs                                | High-throughput evaluation of truncated elements localization (insertional mutagenesis, proximity of host genes) and residual transcriptional/regulatory activity (effects of LTR conserved sites, expression of truncated RNA/proteins with functional significance), analysis of eventual unfixed <i>de novo</i> L1-mediated retrotransposition events |
| Insufficient amount and characterization of samples                                     | Low statistical significance of the data, inclusion of confounding factors                                               | Use of statistically significant samples, inclusion of healthy controls, eventual inclusion of different pathological controls, detailed characterization of individuals healthy status and behavioral components                                                                                                                                        |
| Low consideration of individual and environmental variables                             | Low statistical significance of the data, inclusion of confounding factors                                               | Analysis of eventual HERV-W polymorphisms/allelic variants among human population and their association to ethnicity, sex, age and healthy status                                                                                                                                                                                                        |
